# Supplementary material for: The reaction pathway of the CO2RR to low-carbon alcohols: a theoretical study
Source: Royal Society of Chemistry journal article supplement (doi:10.1039/d0nj01265c), 2020-01-01
Supplement: d0nj01265c1.pdf [file d0nj01265c1.pdf]

## Supporting information

**Anmin Liu**<sup>1, a, \*</sup>, **Weixin Guan**<sup>1, a</sup>, **Qian Cao**<sup>a</sup>, **Xuefeng Ren**<sup>d, \*</sup>, **Liguo Gao**<sup>a</sup>, **Qidong Zhao**<sup>a</sup>, **Tingli Ma**<sup>b, c, \*</sup>

<sup>a</sup> State Key Laboratory of Fine Chemicals, School of Chemical Engineering, Dalian University of Technology, China.

E-mail: [anmin0127@163.com](mailto:anmin0127@163.com), [liuanmin@dlut.edu.cn](mailto:liuanmin@dlut.edu.cn)

<sup>b</sup> Department of Materials Science and Engineering, China Jiliang University, Hangzhou, 310018, China.

<sup>c</sup> Graduate School of Life Science and Systems Engineering, Kyushu Institute of Technology, 2-4 Hibikino, Wakamatsu, Kitakyushu, Fukuoka 808-0196, Japan.

E-mail: [tinglima@life.kyutech.ac.jp](mailto:tinglima@life.kyutech.ac.jp)

<sup>d</sup> School of Ocean Science and Technology, Dalian University of Technology, Panjin, 124221, China.

E-mail: [renxuefeng@dlut.edu.cn](mailto:renxuefeng@dlut.edu.cn)

**Table S1.**  $E_{\text{HOMO}}$  and  $E_{\text{LUMO}}$  of the intermediates in CO<sub>2</sub>RR to methanol

| intermediate      | HOMO<br>(Ha) | LUMO<br>(Ha) | intermediate                     | HOMO<br>(Ha) | LUMO<br>(Ha) |
|-------------------|--------------|--------------|----------------------------------|--------------|--------------|
| CO <sub>2</sub>   | -0.3860      | -0.0197      | TS5                              | 0.0329       | 0.1267       |
| COOH <sup>-</sup> | 0.0122       | 0.1395       | H <sub>3</sub> CO                | 0.0329       | 0.1267       |
| CO                | -0.3875      | -0.0424      | CH <sub>3</sub> OH               | -0.2843      | -0.0132      |
| HCO               | 0.0627       | 0.1452       | HCOOH                            | -0.3102      | -0.0257      |
| TS4               | -0.2819      | -0.0643      | H <sub>2</sub> COOH <sup>-</sup> | 0.0059       | 0.1200       |
| H <sub>2</sub> CO | -0.2819      | -0.0642      | CH <sub>2</sub> OOH <sup>-</sup> | -0.3391      | -0.1889      |

**Table S2.** Gibbs free energy of the intermediates in CO<sub>2</sub>RR to methanol

| intermediate       | $\Delta G$ (Ha) |
|--------------------|-----------------|
| CO <sub>2</sub>    | -188.6559       |
| COOH               | -189.2200       |
| CO                 | -113.3630       |
| HCO                | -113.9150       |
| TS4                | -114.5370       |
| H <sub>2</sub> CO  | -114.5360       |
| TS5                | -115.1345       |
| H <sub>3</sub> CO  | -115.1350       |
| CH <sub>3</sub> OH | -115.7370       |
| H <sup>+</sup>     | -0.1746         |
| H <sub>2</sub> O   | -76.4549        |
| H                  | -0.5129         |

**Table S3.**  $E_{\text{HOMO}}$  and  $E_{\text{LUMO}}$  of the intermediates in CO<sub>2</sub>RR to ethanol

| intermediate    | HOMO (Ha) | LUMO (Ha) | intermediate                       | HOMO (Ha) | LUMO (Ha) |
|-----------------|-----------|-----------|------------------------------------|-----------|-----------|
| CO <sub>2</sub> | -0.3860   | -0.0197   | CH <sub>3</sub> CO                 | -0.1243   | -0.0584   |
| COOH-           | 0.0122    | 0.1395    | CH <sub>3</sub> CHO                | -0.1739   | -0.0579   |
| CO              | -0.3875   | -0.0424   | CH <sub>3</sub> CH <sub>2</sub> OH | -0.1895   | 0.0542    |
| CO-             | 0.0626    | 0.2654    | OCHCH <sub>2</sub>                 | -0.1556   | -0.0588   |
| OCCO            | -0.1991   | -0.1703   | HOCH <sub>2</sub> CH <sub>2</sub>  | -0.1176   | 0.0506    |
| OCHCO           | -0.2357   | -0.1673   | OCHCH <sub>3</sub>                 | -0.1707   | -0.0797   |

**Table S4.** Gibbs free energy of the intermediates in CO<sub>2</sub>RR to ethanol

| intermediate                       | $\Delta G$ (Ha) |
|------------------------------------|-----------------|
| CO <sub>2</sub>                    | -188.6600       |
| COOH-                              | -189.2200       |
| CO                                 | -113.3600       |
| OCCO                               | -226.5900       |
| OCHCO                              | -227.1800       |
| CH <sub>3</sub> CO                 | -153.2100       |
| CH <sub>3</sub> CHO                | -153.8500       |
| CH <sub>3</sub> CH <sub>2</sub> OH | -155.0400       |
| OCHCH <sub>2</sub>                 | -153.2100       |
| HOCH <sub>2</sub> CH <sub>2</sub>  | -154.3800       |
